# Supplementary material
Source: PubMed Central journal article supplement (PMC4992625)
Supplement: NIHMS798247-supplement-1.pdf [file NIHMS798247-supplement-1.pdf]

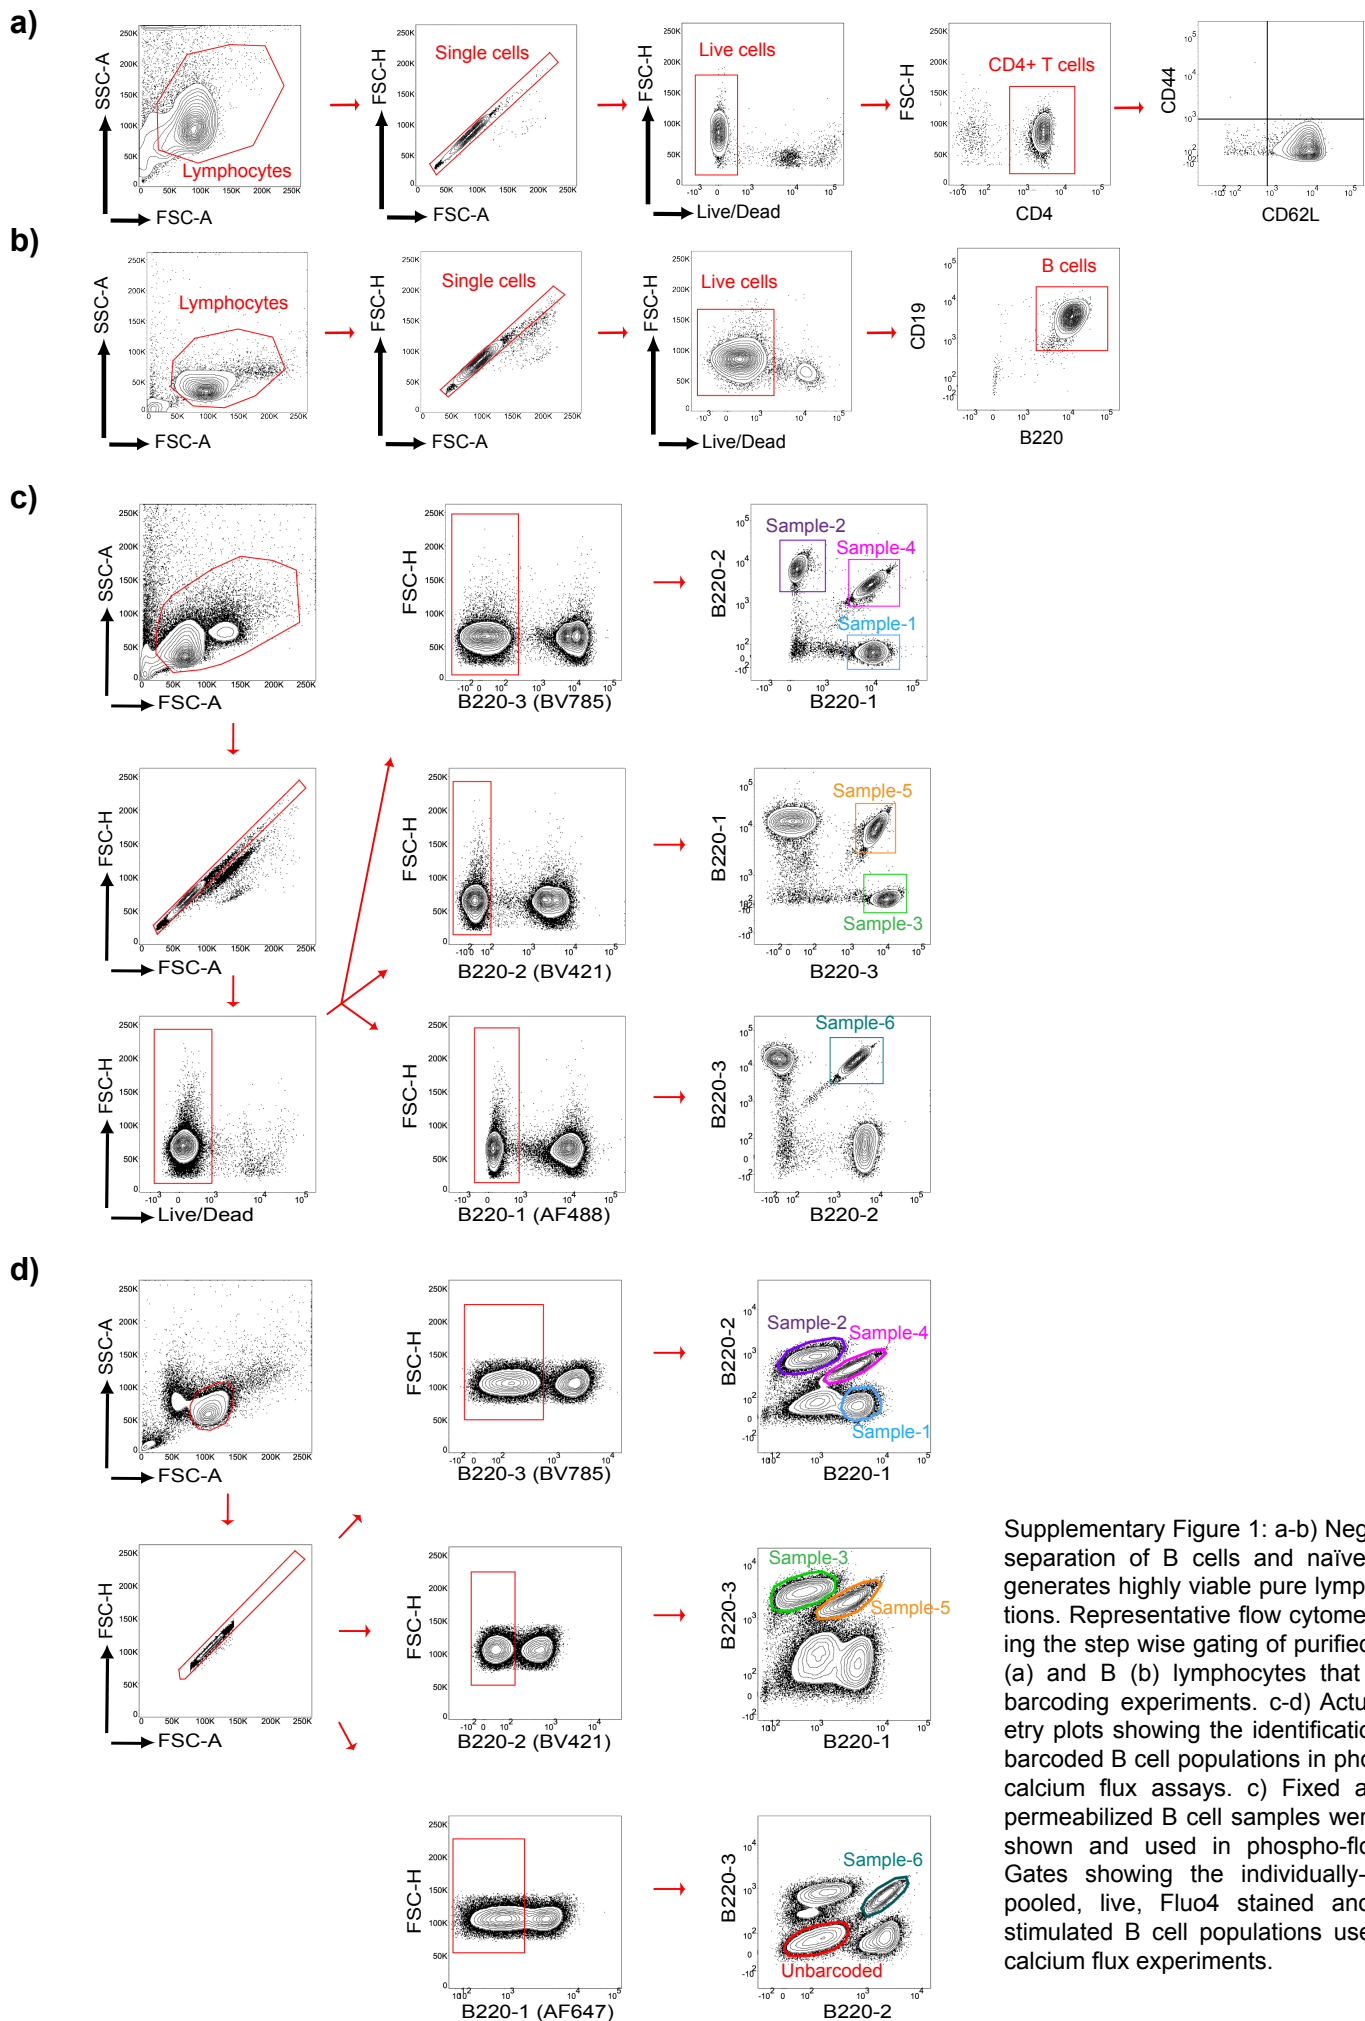

Supplementary Figure 1: a-b) Negative magnetic separation of B cells and naïve CD4<sup>+</sup> T cells generates highly viable pure lymphocyte populations. Representative flow cytometry plots showing the step wise gating of purified naïve CD4<sup>+</sup> T (a) and B (b) lymphocytes that were used in barcoding experiments. c-d) Actual flow cytometry plots showing the identification of individual barcoded B cell populations in phospho-flow and calcium flux assays. c) Fixed and methanol-permeabilized B cell samples were barcoded as shown and used in phospho-flow assays. d) Gates showing the individually-barcoded and pooled, live, Fluor4 stained and successively stimulated B cell populations used in real time calcium flux experiments.

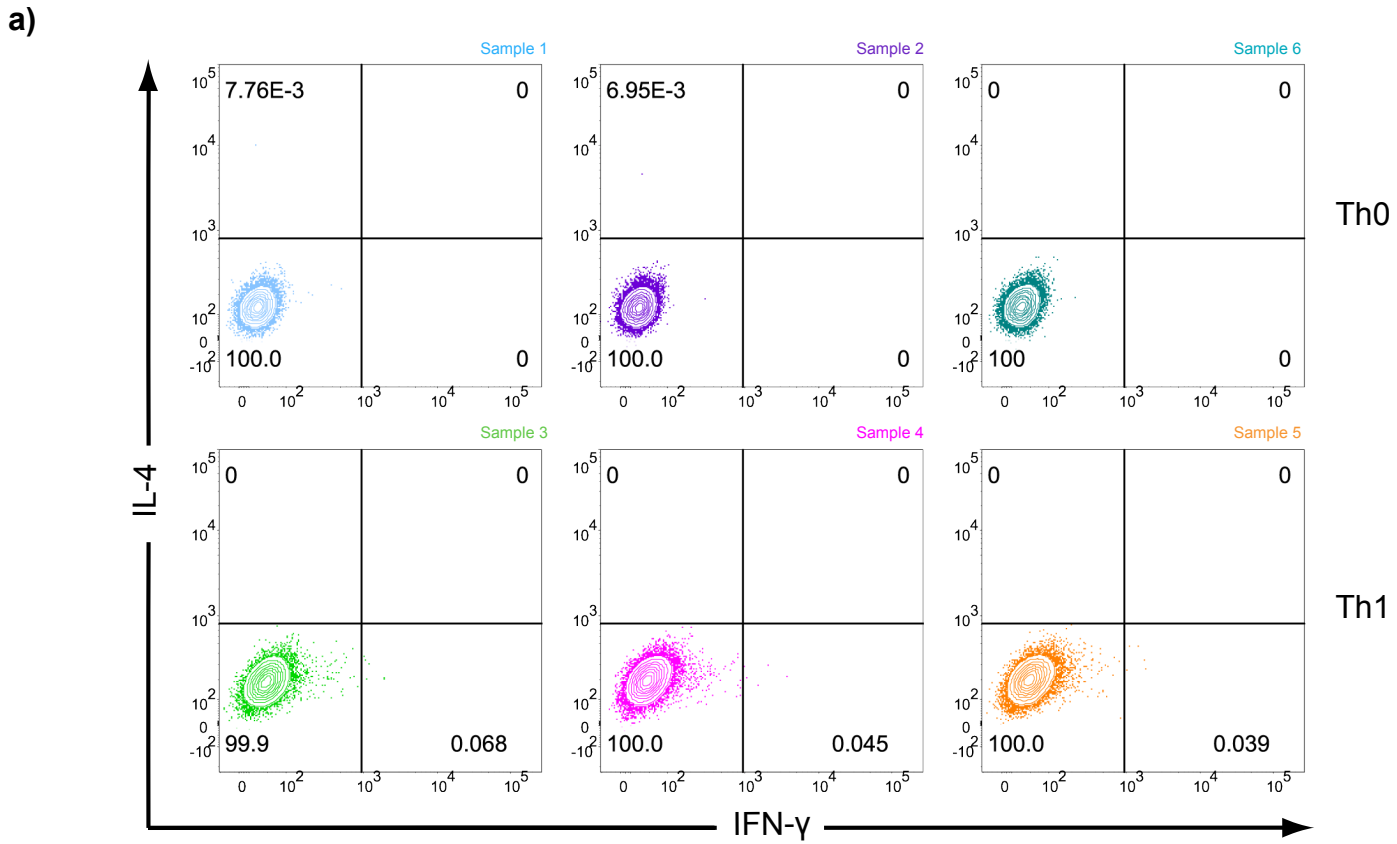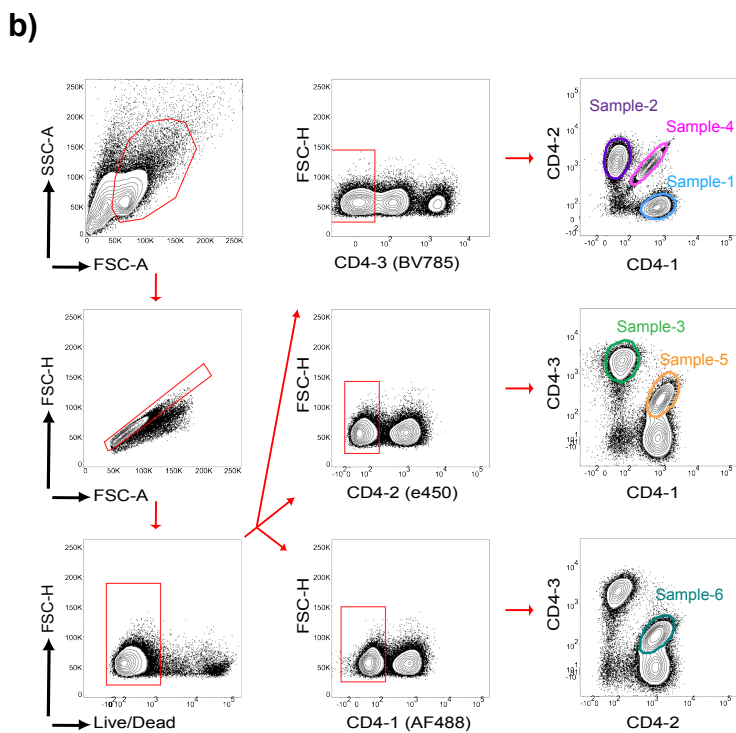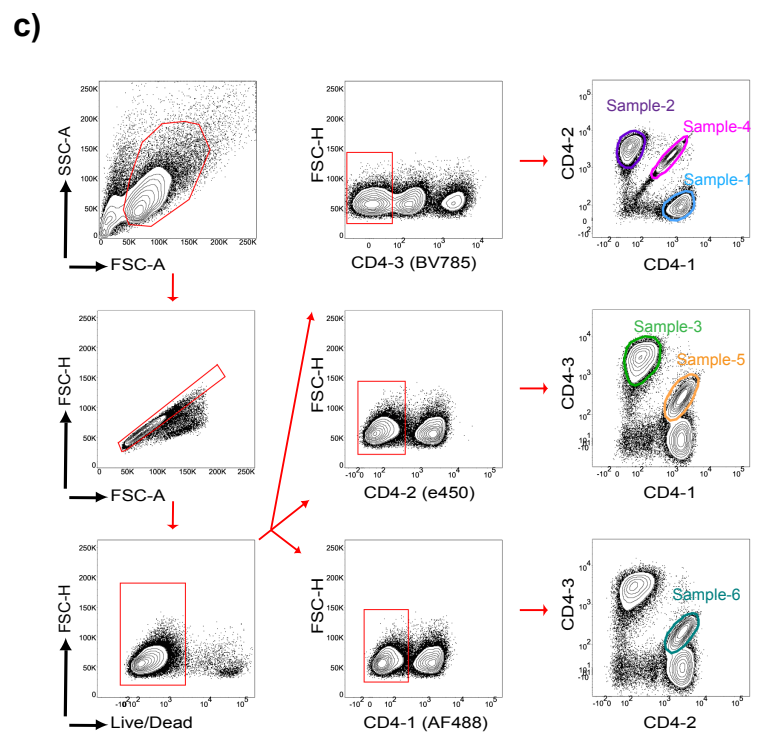

Supplementary Figure 2: Barcoded T cell populations can be distinguished after 6 hours of culturing in both restimulating or non-restimulating conditions. a) Representative flow cytometry plots showing the percentages of IFN- $\gamma$ - and/or IL-4- expressing barcoded cells for both Th0 (samples 1,2,6) and Th1 (samples 3,4,5) differentiated in the non-restimulated group. b-c) Representative flow cytometry plots showing the actual gating of barcoded populations in the non-restimulated (b) and restimulated groups (c).

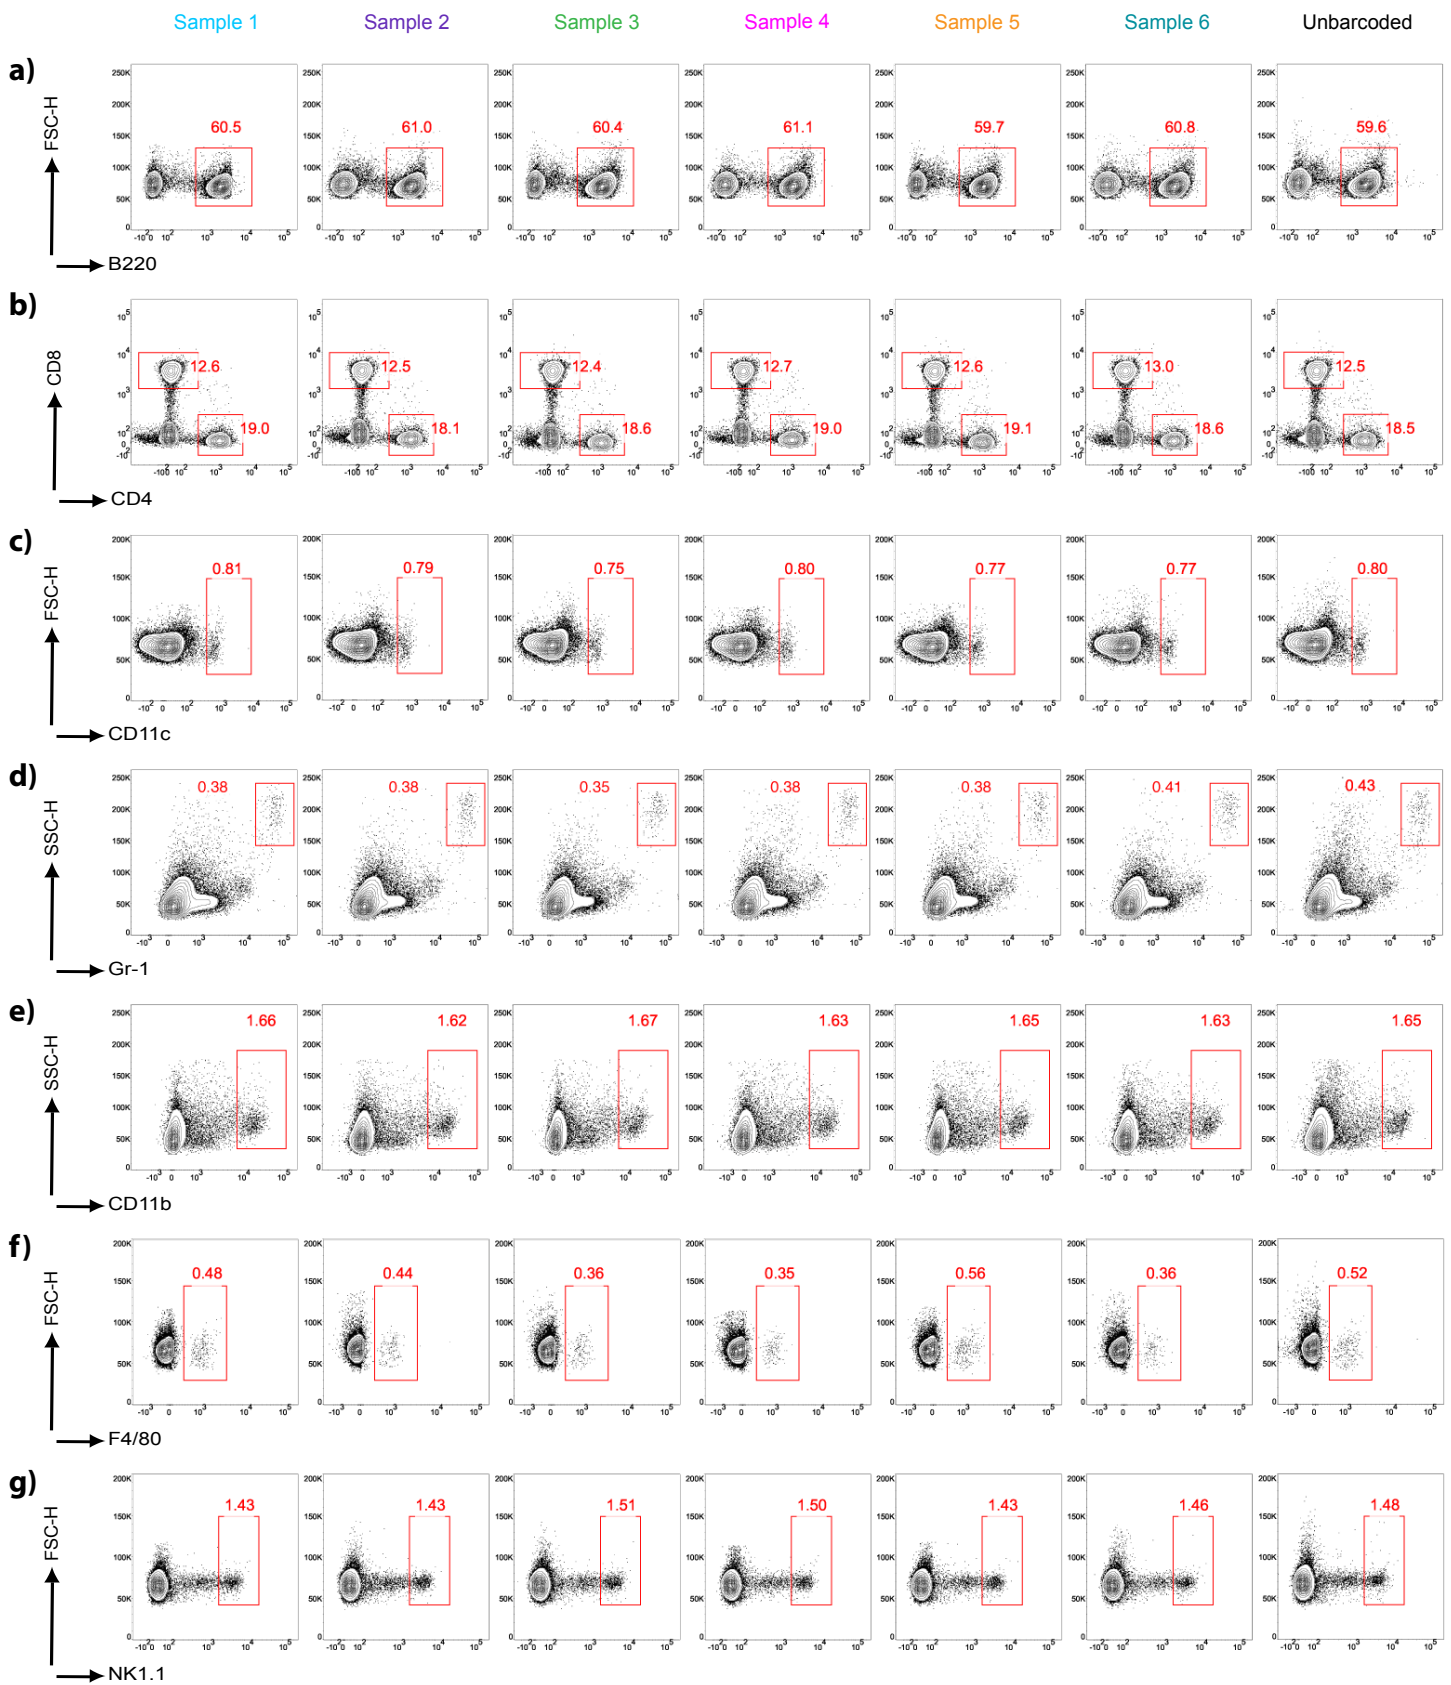

Supplementary Figure 3: Flow cytometry plots of a representative set of the six uniquely barcoded samples from the data in (Figure 6c). Red rectangular gates show B cells (a), CD4+ and CD8+ T cells (b), dendritic cells (c), granulocytes (d), monocytes (e), macrophages (f) and NK cell (g). Numbers refer to the percentage of the cells of each type within the live cell gate.

# Supplementary Table 1

|                                                    | Clone      | Conjugate     | Vendor                  | Catalog no  |
|----------------------------------------------------|------------|---------------|-------------------------|-------------|
| Rat anti human/mouse B220                          | RA3-6B2    | AF488         | Biologend               | 103225      |
| Rat anti human/mouse B220                          | RA3-6B2    | BV785         | Biologend               | 103246      |
| Rat anti human/mouse B220                          | RA3-6B2    | BV421         | Biologend               | 103240      |
| Rat anti human/mouse B220                          | RA3-6B2    | PE-CF594      | BD                      | 562290      |
| Rat anti human/mouse B220                          | RA3-6B2    | AF700         | Biologend               | 109822      |
| Rat anti human/mouse B220                          | RA3-6B2    | AF647         | Biologend               | 103226      |
| Rat anti human/mouse B220                          | RA3-6B2    | PE            | Biologend               | 103208      |
| Rat anti mouse CD4                                 | RM4-5      | AF488         | Biologend               | 100529      |
| Rat anti mouse CD4                                 | RM4-5      | e450          | Ebioscience             | 48-0042-82  |
| Rat anti mouse CD4                                 | RM4-5      | BV785         | Biologend               | 100552      |
| Rat anti mouse CD4                                 | RM4-5      | BV421         | Biologend               | 100544      |
| Rat anti mouse CD4                                 | RM4-5      | AF647         | Biologend               | 100530      |
| Rat anti mouse CD4                                 | RM4-5      | APC           | Biologend               | 100516      |
| Rat anti mouse CD4                                 | RM4-5      | BV650         | Biologend               | 100545      |
| Rat anti mouse CD3                                 | 17A2       | AF700         | Biologend               | 100216      |
| Rat anti mouse CD3                                 | 17A2       | BV785         | Biologend               | 100232      |
| Rat anti human/mouse CD44                          | IM7        | APC           | Biologend               | 103012      |
| Rat anti mouse CD62L                               | MEL-14     | PE            | Biologend               | 104408      |
| Mouse anti mouse CD45.2                            | 104        | AF700         | Biologend               | 109822      |
| Mouse anti mouse CD45.2                            | 104        | FITC          | Biologend               | 109816      |
| Mouse anti mouse CD45.2                            | 104        | PE            | Biologend               | 109808      |
| Mouse anti mouse CD45.2                            | 104        | BV421         | Biologend               | 109832      |
| Mouse anti mouse CD45.2                            | 104        | APC           | Biologend               | 109814      |
| Mouse anti mouse CD45.2                            | 104        | AF647         | Biologend               | 109818      |
| Rat anti mouse CD8                                 | 53-6.7     | BV785         | Biologend               | 100750      |
| Rat anti mouse CD8                                 | 53-6.7     | BV711         | Biologend               | 100748      |
| Rat anti mouse CD19                                | 6D5        | BV421         | Biologend               | 115538      |
| Mouse anti mouse NK1.1                             | PK136      | Percp         | Biologend               | 108726      |
| Mouse anti mouse NK1.1                             | PK136      | AF647         | Biologend               | 108418      |
| Rat anti mouse Gr1                                 | RB6-8C6    | AF488         | Biologend               | 108417      |
| Rat anti mouse Gr1                                 | RB6-8C6    | BV605         | Biologend               | 108440      |
| Rat anti mouse F4/80                               | BM8        | PE.Cy7        | Biologend               | 123114      |
| Rat anti mouse F4/80                               | BM8        | Percp.Cy5.5   | Biologend               | 123128      |
| Rat anti mouse CD11b                               | M1/70      | PE.Cy7        | Biologend               | 101216      |
| Hamster anti mouse CD11c                           | N418       | PE-Dazzle 594 | Biologend               | 117348      |
| Hamster anti mouse CD11c                           | N418       | BV421         | Biologend               | 117330      |
| Donkey anti mouse IgM (Fab'2) $\mu$ chain specific | Polyclonal | Unconjugated  | Jackson Immuno research | 715-006-020 |
| Hamster anti mouse CD3                             | 145-2C11   | Unconjugated  | Biologend               | 100331      |
| Hamster anti mouse CD28                            | 37.51      | Unconjugated  | Biologend               | 102112      |
| Rat anti mouse IL-4                                | 1B11       | Unconjugated  | Biologend               | 504108      |
| Rat anti mouse IL-4                                | 1B11       | AF647         | Biologend               | 504110      |
| Rat anti mouse IFN- $\gamma$                       | XMG1.2     | PE            | Biologend               | 505808      |
| Rat anti mouse CD16/32                             | 93         | Unconjugated  | Biologend               | 101302      |
| Rat IgG2a isotype control                          | RTK2758    | AF700         | Biologend               | 400528      |
| Rat IgG2a isotype control                          | RTK2758    | PE            | Biologend               | 400507      |
| Rat IgG2a isotype control                          | RTK2758    | BV421         | Biologend               | 400535      |
| Rat IgG2a isotype control                          | RTK2758    | AF488         | Biologend               | 400525      |
| Rat IgG2a isotype control                          | RTK2758    | AF647         | Biologend               | 400526      |

Biologend, San Diego, CA, USA

Ebioscience, San Diego, CA, USA

BD Biosciences, San Jose, CA, USA

Jackson Immunoresearch, West Grove, PA, USA
